# Supplementary material for: High Pretreatment Serum PD-L1 Levels Are Associated with Muscle Invasion and Shorter Survival in Upper Tract Urothelial Carcinoma
Source: MDPI journal article supplement (doi:10.3390/biomedicines10102560), 2022-10-13
Supplement: s1 [file s1]

## Supplementary material

# High Pretreatment Serum PD-L1 Levels are Associated with Muscle Invasion and Shorter Survival in Upper Tract Urothelial Carcinoma

Ádám Széles <sup>1,2</sup>, Petra Terézia Kovács <sup>1</sup>, Anita Csizmarik <sup>1</sup>, Melinda Váradi <sup>1</sup>, Péter Riesz <sup>1</sup>, Tamás Fazekas <sup>1,2</sup>, Szilárd Váncsa <sup>2,3,4</sup>, Péter Hegyi <sup>2,3,4</sup>, Csilla Oláh <sup>5</sup>, Stephan Tschirdewahn <sup>5</sup>, Christopher Darr <sup>5</sup>, Ulrich Krafft <sup>5</sup>, Viktor Grünwald <sup>5</sup>, Boris Hadaschik <sup>5</sup>, Orsolya Horváth <sup>6</sup>, Péter Nyirády <sup>1</sup> and Tibor Szarvas <sup>1,5,\*</sup>

<sup>1</sup> Department of Urology, Semmelweis University, Ulloi ut 78/b, 1082 Budapest, Hungary

<sup>2</sup> Centre for Translational Medicine, Ulloi ut 26, 1085 Budapest, Hungary

<sup>3</sup> Institute for Translational Medicine, Medical School, University of Pécs, Szigeti út 12., 7624, Pécs, Hungary

<sup>4</sup> Division of Pancreatic Diseases, Heart and Vascular Center, Semmelweis University, Budapest, Hungary

<sup>5</sup> Department of Urology, University of Duisburg-Essen and German Cancer Consortium (DTKK)-University Hospital Essen, Hufelandstraße 55, D-45147 Essen, Germany

<sup>6</sup> Department of Genitourinary Medical Oncology and Clinical Pharmacology, National Institute of Oncology, Ráth György utca 7-9., 1122 Budapest, Hungary

\* Correspondence: szarvas.tibor@med.semmelweis-univ.hu

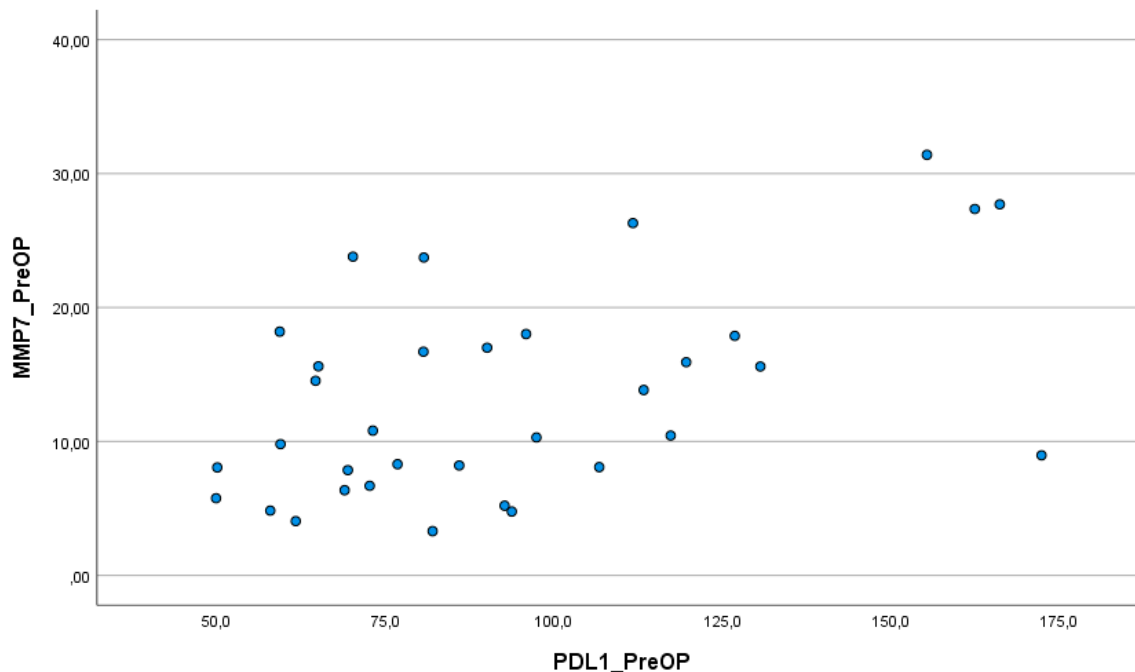

**Figure S1.** Spearman's rank correlation analysis between preoperative sPD-L1 and MMP-7 levels in the RNU cohort. ( $r_s=0.445$ ,  $p=0.008$ )

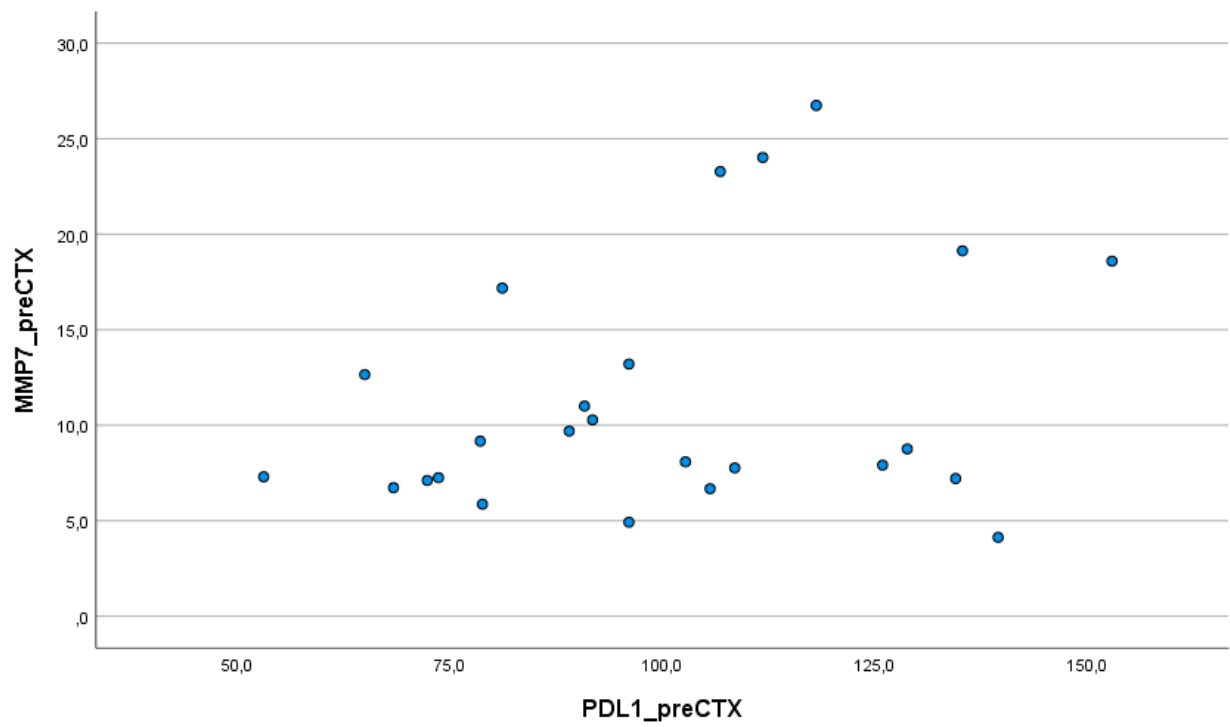

**Figure S2.** Spearman's rank correlation analysis between pretreatment sPD-L1 and MMP-7 levels in the CTX cohort. ( $r_s=0.217$ ,  $p=0.297$ )

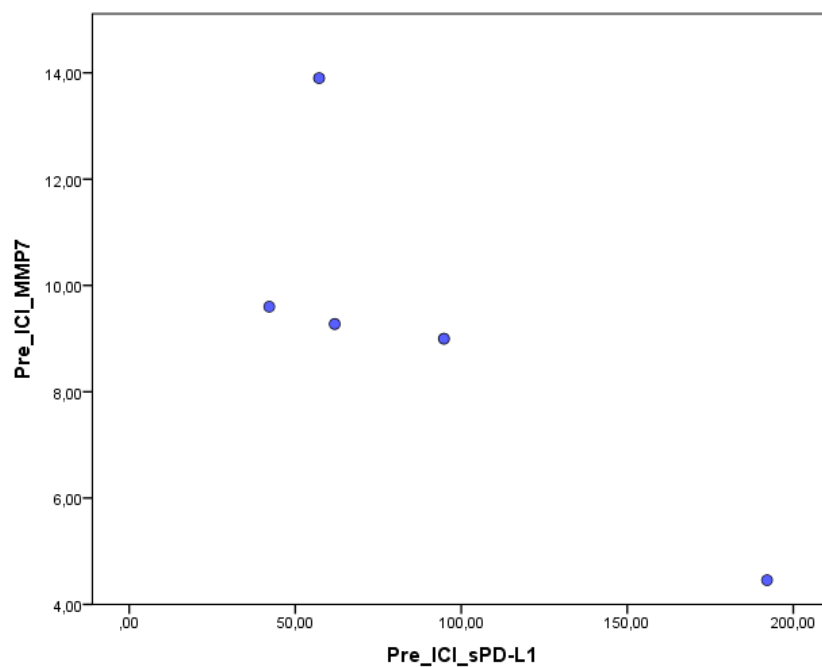

**Figure S3.** Spearman's rank correlation analysis between pretreatment sPD-L1 and MMP-7 levels in the ICI cohort. ( $r_s=0.900$ ,  $p=0.307$ )

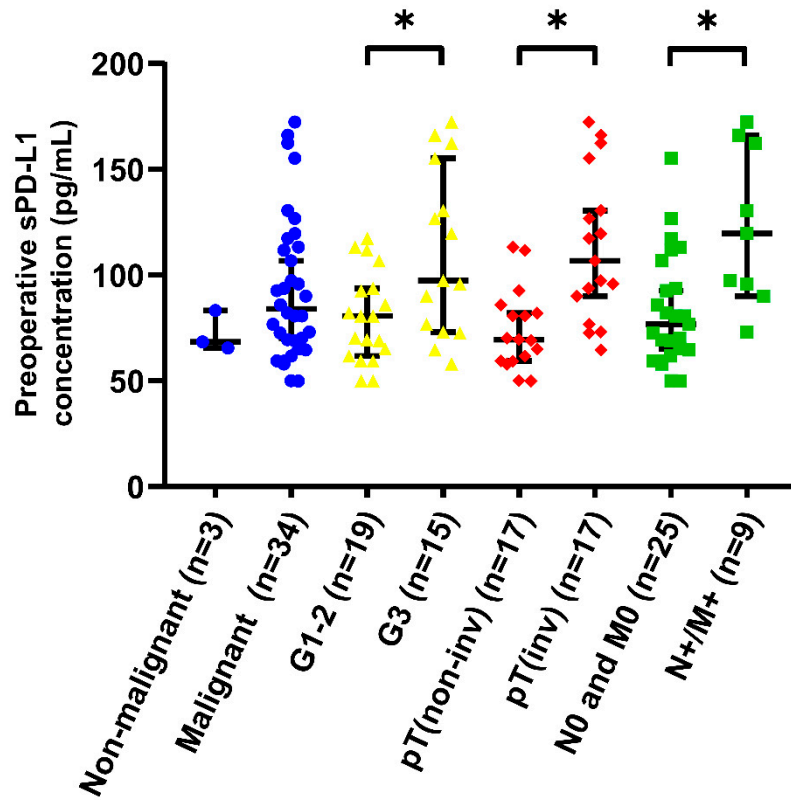

**Figure S4.** Scatter plot of the association of preoperative sPD-L1 concentration and clinicopathological parameters in the RNU cohort. \* significant difference, pT(non-inv): pTa-pT1, pT(inv): pT2-pT4.

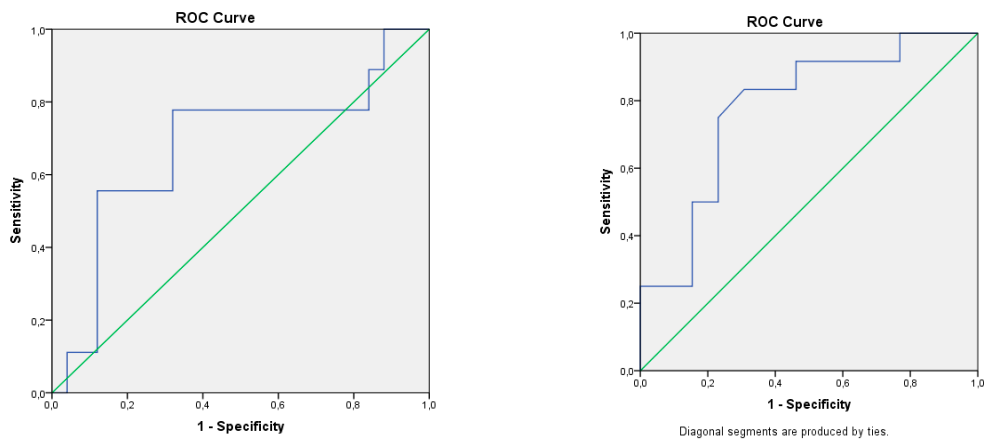

**Figure S5.** Receiver operating curve (ROC) analysis of the cut-off levels in the RNU and CTX cohorts. RNU cut-off : 118.5 pg/ml (Sensitivity: 0.556, 1-Specificity: 0.120), CTX cut-off: 93.9 pg/ml (Sensitivity: 0.833, 1-Specificity: 0.308),



|                 |    |        |                |                  |       |                |              |    |       |                |              |       |               |       |  |
|-----------------|----|--------|----------------|------------------|-------|----------------|--------------|----|-------|----------------|--------------|-------|---------------|-------|--|
| median cut-off* | 17 | ref.   |                |                  | ref.  |                |              | 11 | ref.  |                |              | ref.  |               |       |  |
| median cut-off* | 17 | 4.023  | 1.060 - 15.269 | <b>0.041</b>     | 2.793 | 1.011 - 7.716  | <b>0.048</b> | 14 | 6.956 | 1.461 - 33.110 | <b>0.015</b> | 1.584 | 0.560 - 4.478 | 0.386 |  |
| ROC cut-off**   | 27 | ref.   |                |                  | ref.  |                |              | 11 | ref.  |                |              | ref.  |               |       |  |
| ROC cut-off**   | 7  | 12.114 | 2.990 - 49.082 | <b>&lt;0.001</b> | 6.667 | 2.140 - 20.764 | <b>0.001</b> | 14 | 6.956 | 1.461 - 33.110 | <b>0.015</b> | 1.584 | 0.560 - 4.478 | 0.386 |  |

**Table S1.** Correlation of clinicopathological parameters and pretreatment sPD-L1 concentrations with patients' prognosis \* - median cut-off value for RNU is 84.0 pg/ml, median cut-off value for CTX is 96.1 pg/ml; \*\* ROC cut-off value for RNU is 118.5 pg/ml, ROC cut-off value for CTX is 93.9 pg/ml; RNU – radical nephroureterectomy, CTX – chemotherapy; OS – overall survival; PFS – progression-free survival; ECOG PS – Eastern Cooperative Oncology Group performance status, Gem/Cis – gemcitabine + cisplatin; Gem/Carbo – gemcitabine + carboplatin; bold font represents significant value.
